# Supplementary material
Source: publisher site journal article supplement (https://www.dovepress.com/article/336108)
Supplement: Supplementary file 1 [file get_supplementary_file.php]

Supplementary Methods - Time course of Resistive breathing – induced lung injury

Dimitrios Toumpanakis, Athanasia Chatzianastasiou, Vyronia Vassilakopoulou, Eleftheria Mizi, Maria Dettoraki, Fotis Perlikos, Georgia Giatra, Nikolaos Mikos, Stamatios Theocharis, Theodoros Vassilakopoulos

An independent set of experiments was performed to provide a time course of resistive breathing-induced lung injury and to describe the time dependence of the individual indices of lung injury, in terms of alterations in respiratory system mechanics, BAL protein level, BAL cellularity and histology.

Adult male C57BL/6 mice (8-10 weeks old) were subjected to resistive breathing through tracheal banding (to reduce tracheal surface area by 50%) for 6, 18 and 24 hours. Sham operated animals were used for comparisons (control). Following resistive breathing the presence of lung injury was investigated by measuring respiratory system mechanics, BAL total protein levels (as an indirect marker of lung permeability) levels, BAL total and differential cell count and histology.

(a full description of methods is provided in the main text of the manuscript).

According to our findings, RB provokes a time-dependent increase in total protein levels in BAL fluid, with a statistically significant increase over control values firstly noticed at 18hrs (p=0.007 to sham), without further increase at 24hrs (p<0.001 to sham, p=0.11 to 18h RB) (fig.1S). Accordingly, increased total cell number is noticed in BAL fluid after 18h of RB (p<0.001 to sham), without a further increase at 24h (p<0.001 to sham, p=0.68 to 18h RB), due to a significant increase of both macrophages and neutrophils (Fig.2S). It is worth noticing that a trend for increased cellularity was also found at 6h of RB (p=0.06 to sham), mainly due to an increase in macrophages count, that did not reach statistical significance. Lymphocytes, although numerical increased at 24h (x10^4/ml, 0.18 ± 0.16), compared to sham (x10^4/ml, 0.04 ± 0.03), they did not show a significant time dependent course (ANOVA, p=0.12).

On the other hand, derangement of respiratory system mechanics, as measured by both the forced oscillation technique and static pressure volume curves, was only noticed at 24h of RB (Fig.3S). In details, tissue viscance (G) increased at 24h, compared to sham (p<0.001) and other time points of RB (p<0.001 to 6h, p=0.001 to 18h). Tissue elasticity increased only at 24h RB (p=0.003 to sham, p<0.0001 to 6h and p=0.008 to 18h RB). As expected, static compliance showed a similar alteration, since it was only decreased at 24h of RB (p<0.001 to sham). Hysteresis of the P-V curve, in contrast, was not altered by RB (ANOVA, p=0.793). Finally, it is interesting, that histological features of lung injury are evident even from 6h of RB (total lung injury score, 6h RB, p=0.03 to sham) and reached a maximum at 18h and 24h (p<0.001 and p<0.001 to sham, respectively) (Fig.4S and Table S1, for a complete description of the histological features of lung injury following RB).

In conclusion, lung injury following resistive breathing is a time-dependent phenomenon, as has been also previously reported by our group, in a rat model of sole inspiratory resistive breathing 1. Although, histological features of lung injury are observed as soon as 6hrs following RB, derangement of lung mechanics (a more robust endpoint) is only observed at 24h of RB. These findings expand previous reports by our group. where resistive breathing-induced lung injury in rats has been shown to exert also load-dependent characteristics 2.

References

1. Toumpanakis D, Kastis GA, Zacharatos P, et al. Inspiratory resistive breathing induces acute lung injury. *Am J Respir Crit Care Med.* 2010;182(9):1129-1136.

2. Loverdos K, Toumpanakis D, Litsiou E, et al. The differential effects of inspiratory, expiratory, and combined resistive breathing on healthy lung. *Int J Chron Obstruct Pulmon Dis.* 2016;11:1623-1638.

Figures





Figure S1. Time course of the total protein levels in BAL fluid following resistive breathing. Data presented as mean ± stdev. n=5-6 per group, * p<0.05 to sham, # p<0.05 to 6h RB.


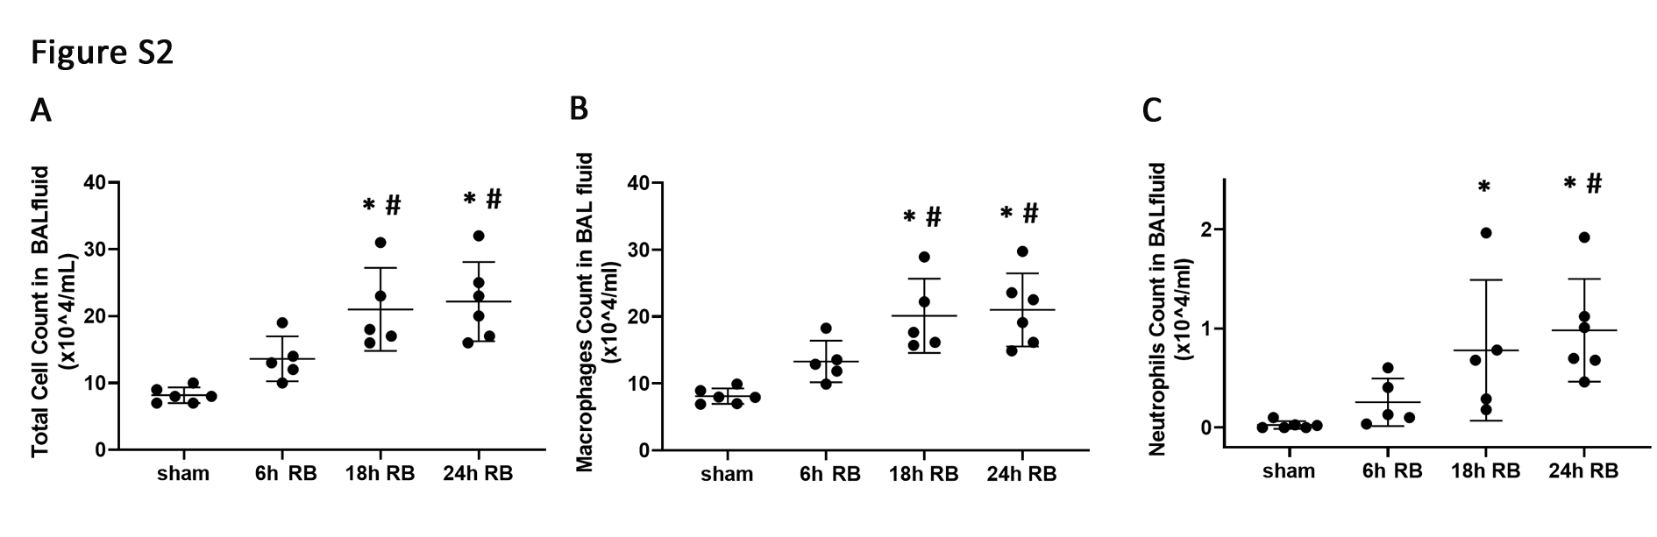


Figure S2. Time course of the total cell count *(A)*, macrophages count *(B)* and neutrophils count *(C)* in BAL fluid following resistive breathing. Data presented as mean ± stdev. n=5-6 per group, * p<0.05 to sham, # p<0.05 to 6h RB.


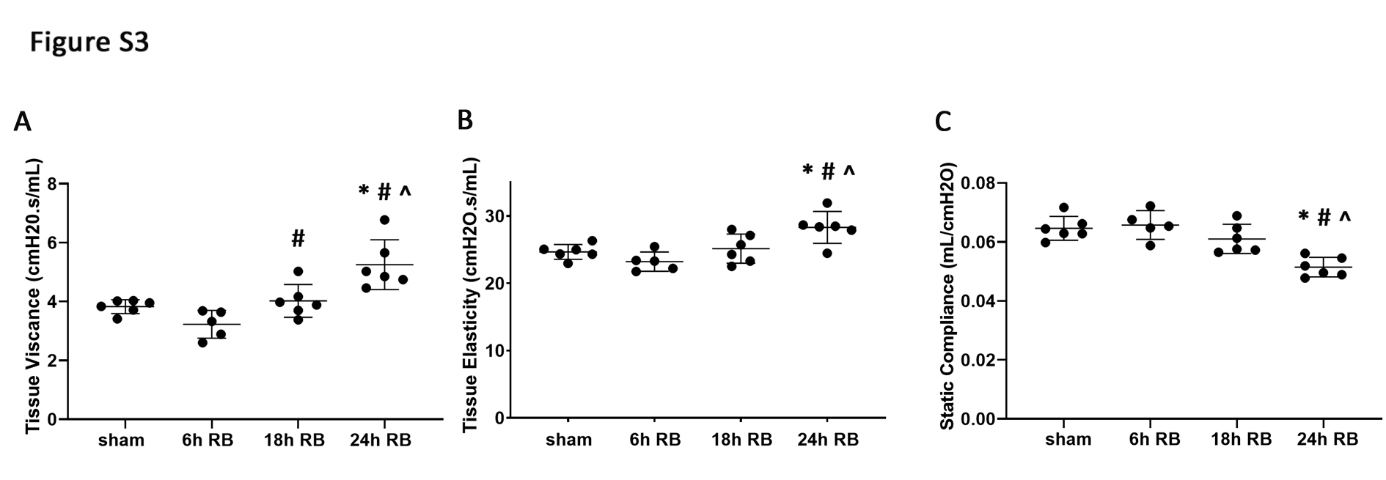


Figure S3. Time course of tissue viscance *(A)*, tissue elasticity *(B)* and static compliance *(C)* following resistive breathing Data presented as mean ± stdev. n=5-6 per group, * p<0.05 to sham, # p<0.05 to 6h RB, ^ p<0.05 to 18h RB.


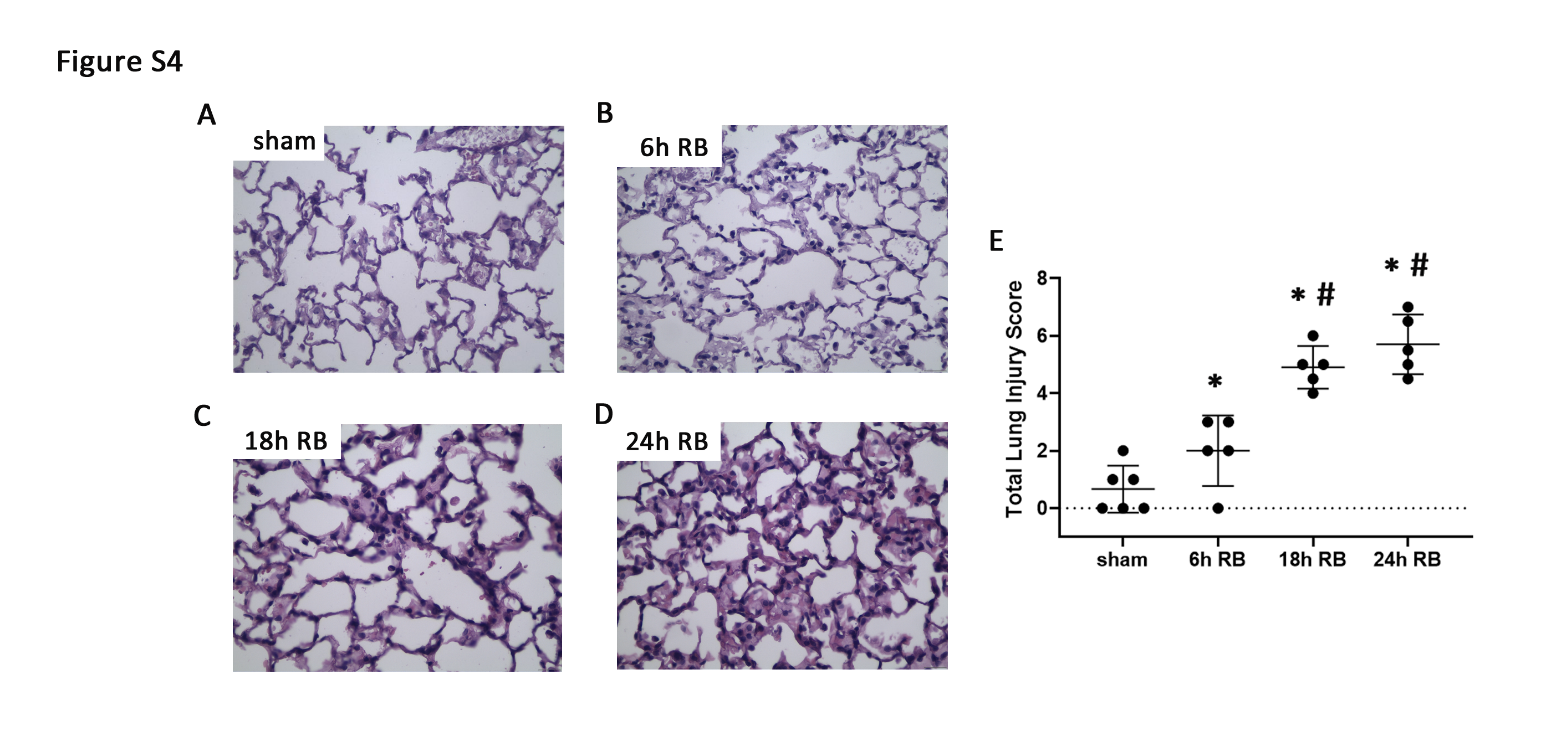
Figure S4. Representative figures of H&E stained lung tissue sections (400x magnification) for sham controls *(A)* and resistive breathing for 6 *(B),*18 *(C)* and 24 hours *(D).* Note the time dependent increase in total lung injury score following resistive breathing *(E).* Data presented as mean ± stdev. n=5-6 per group, * p<0.05 to sham, # p<0.05 to 6h RB.

**Table S1**. Time course of histological features of lung injury following resistive breathing.

|  | focal thickening | capillary congestion | intra-alveolar hemorrhage | interstitial leukocyte infiltration | intra-alveolar leukocyte infiltration | edema | total |
| --- | --- | --- | --- | --- | --- | --- | --- |
| Sham | 0,33 ± 0,51 | 0,25 ± 0,41 | 0,08 ± 0,20 | 0,00 ± 0,00 | 0,00 ± 0,00 | 0,00 ± 0,00 | 0,66 ± 0,81 |
| 6h RB | 0,6 ± 0,54 | 0,20 ± 0,44 | 0,20 ± 0,44 | 0,40 ± 0,54 | 0,40 ± 0,54 | 0,20 ± 0,44 | 2 ± 1,22 * |
| 18h RB | 1,20 ± 0,44 *# | 1,00 ± 0,00 *# | 0,60 ± 0,54 | 1,20 ± 0,44 * | 0,90 ± 0,22 * | 0,00 ± 0,00 | 4,90 ± 0,74 *# |
| 24h RB | 1,20 ± 0,27 *# | 1,30 ± 0,44 *# | 1,20 ± 0,44 *#^ | 1,00 ± 0,61 * | 0,50 ± 0,50 * | 0,50 ± 0,35 *^ | 5,70 ± 1,03 *# |

Data presented as mean ± stdev. n=5-6 per group, * p<0.05 to sham, # p<0.05 to 6h RB,

^ p<0.05 to 18h RB.
